# Supplementary material for: Tuning Gel State Properties of Supramolecular Gels by Functional Group Modification
Source: MDPI journal article supplement (doi:10.3390/molecules24193472), 2019-09-25
Supplement: s1 [file s1]

## Supplementary Information

# Tuning gel state properties of supramolecular gels by functional group modification

Dipankar Ghosh, Matthew T. Mulvey and Krishna K. Damodaran\*

### Table of content

|     |                                                              |    |
|-----|--------------------------------------------------------------|----|
| 1.  | Chemical Structure of <b>4PINA</b> .....                     | 2  |
| 2.  | <sup>1</sup> H-NMR of <b>diNO</b> .....                      | 3  |
| 3.  | <sup>1</sup> H-NMR of <b>INO</b> .....                       | 4  |
| 4.  | <sup>1</sup> H-NMR of <b>PNO</b> .....                       | 5  |
| 5.  | IR spectra of the <i>N</i> -oxide compounds .....            | 6  |
| 6.  | Gelation table .....                                         | 8  |
| 7.  | Determination of MGC .....                                   | 9  |
| 8.  | <i>T<sub>gel</sub></i> experiment .....                      | 9  |
| 9.  | Crystal data .....                                           | 10 |
| 10. | Crystal structure of <b>diNO</b> .....                       | 11 |
| 11. | Crystal structure of <b>INO.2H<sub>2</sub>O</b> .....        | 11 |
| 12. | XRPD of <b>PNO</b> .....                                     | 12 |
| 13. | XRPD of <b>INO</b> .....                                     | 13 |
| 14. | Stress relaxation experiments performed at 1.0% strain.....  | 14 |
| 15. | Stress relaxation experiments performed at 10.0% strain..... | 14 |
| 16. | Amplitude and frequency sweeps .....                         | 15 |

## Chemical Structure of 4PINA

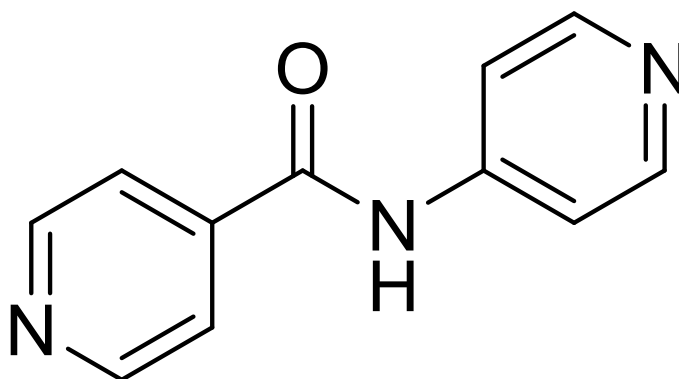

**Scheme S1:** Chemical structure of 4PINA

## NMR spectra of the *N*-oxide compounds

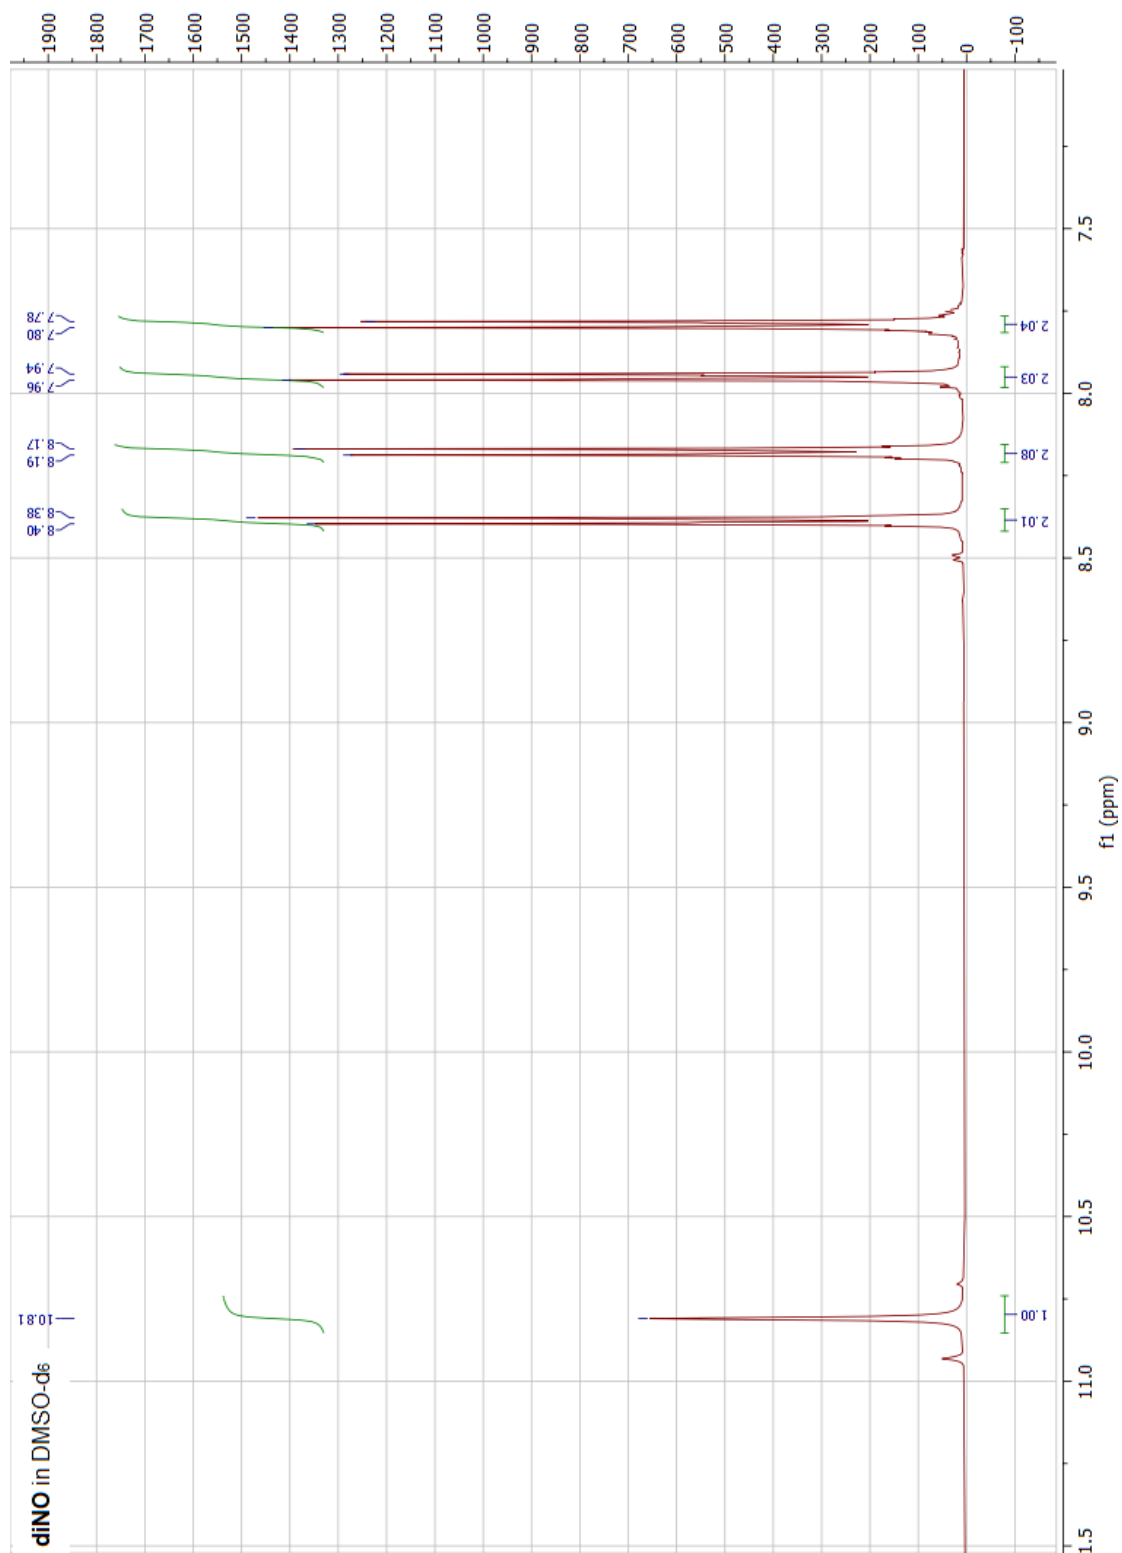

Figure S1:  $^1\text{H}$ -NMR of **diNO** in  $\text{DMSO-}d_6$

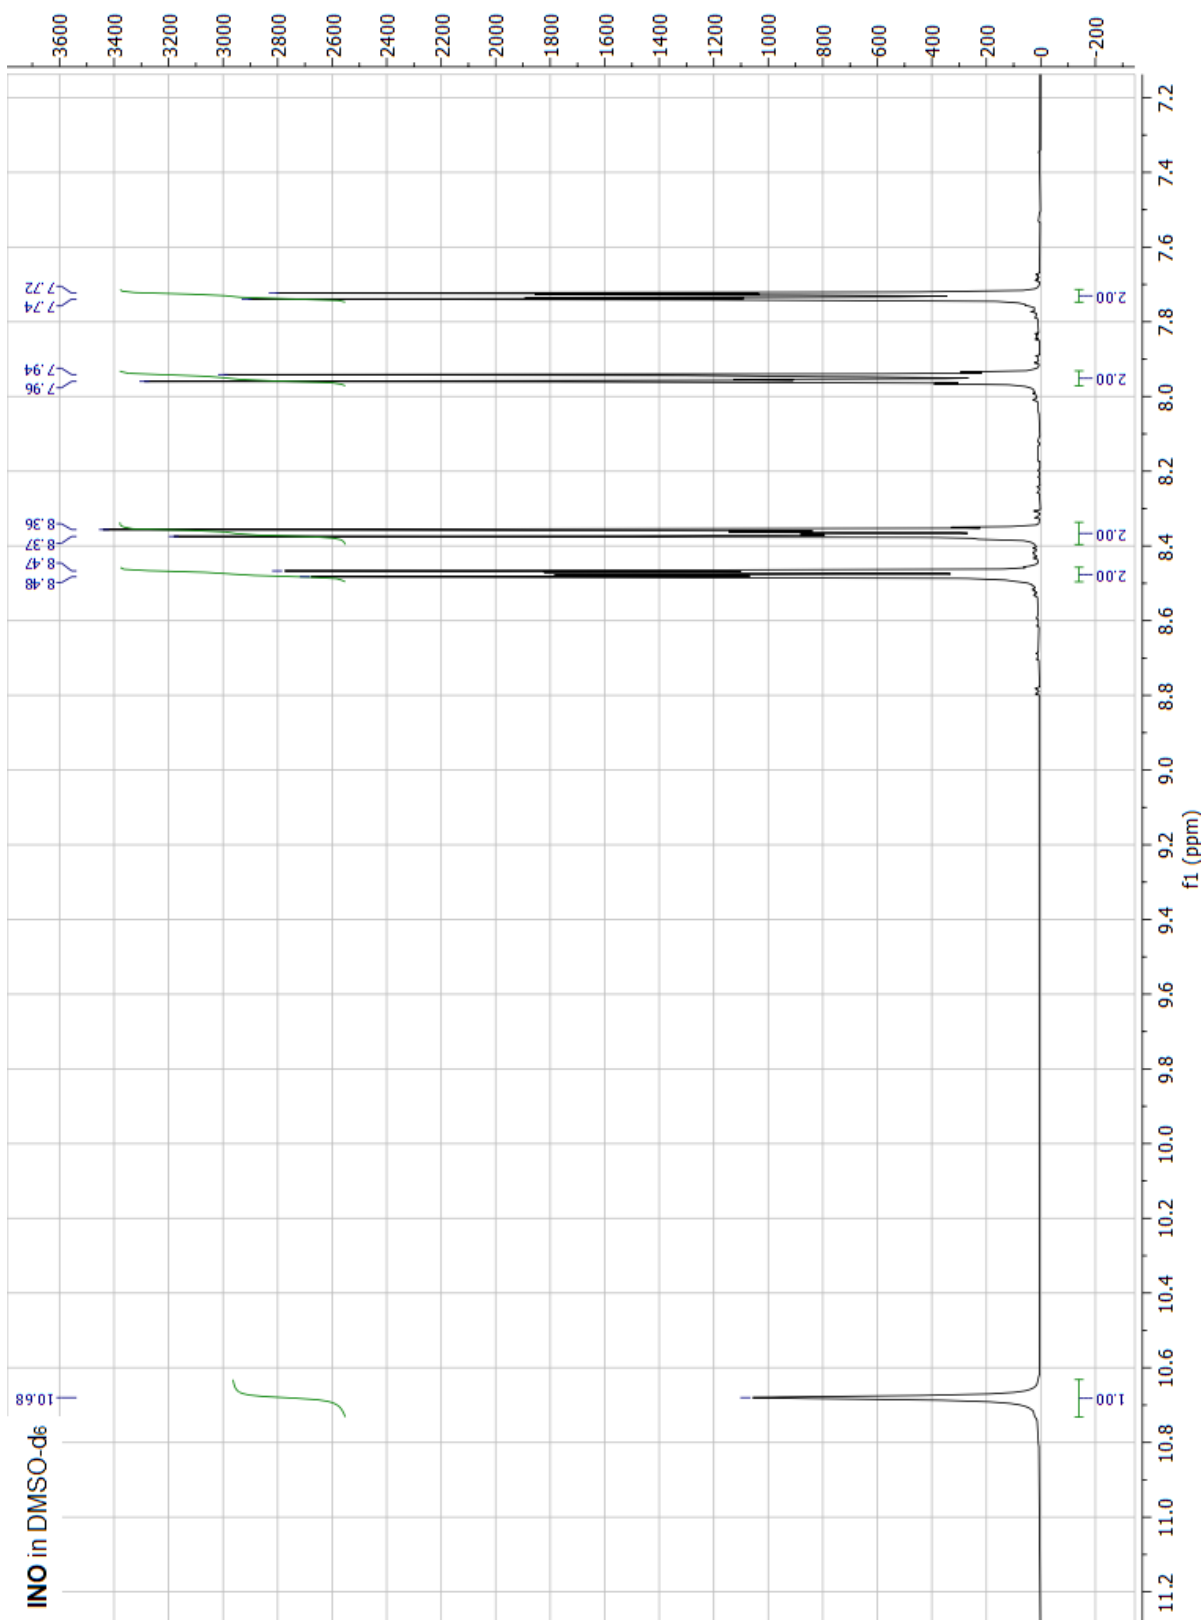

**Figure S2:**  $^1\text{H}$ -NMR of **INO** in  $\text{DMSO-}d_6$

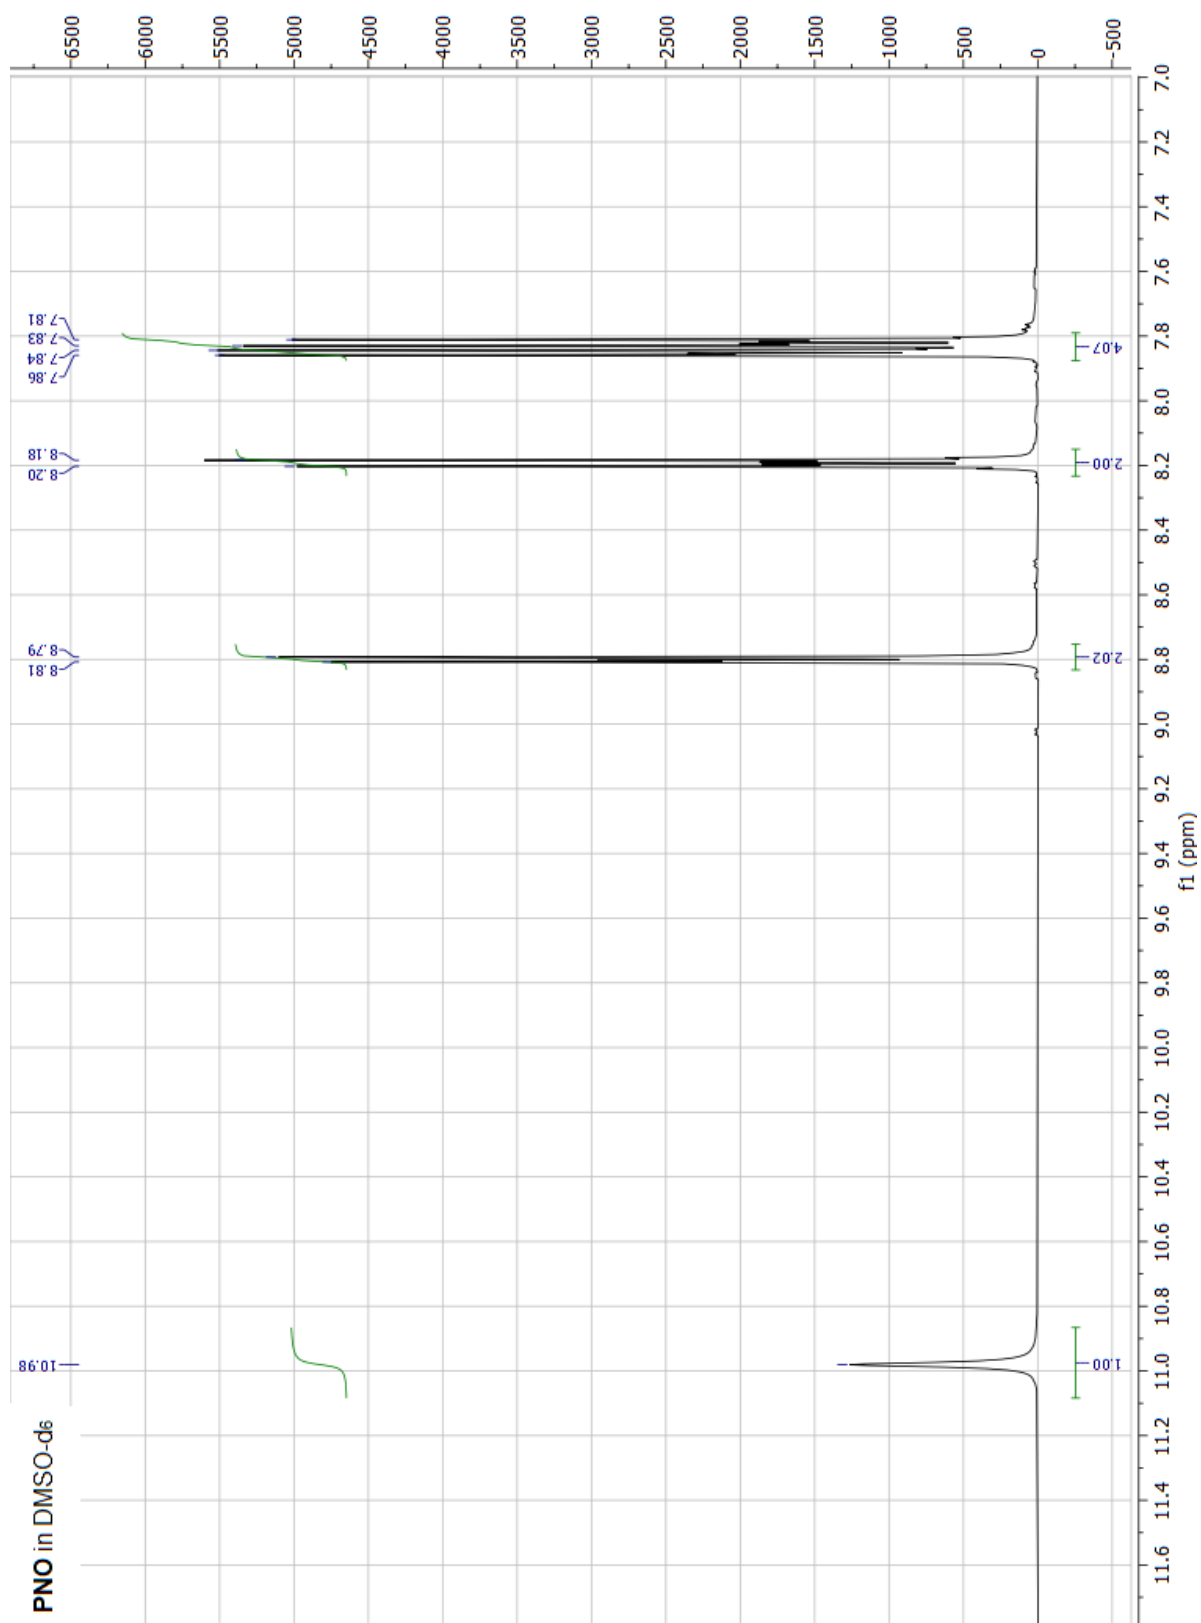

**Figure S3:**  $^1\text{H}$ -NMR of PNO in DMSO- $d_6$

## IR spectra of the *N*-oxide compounds

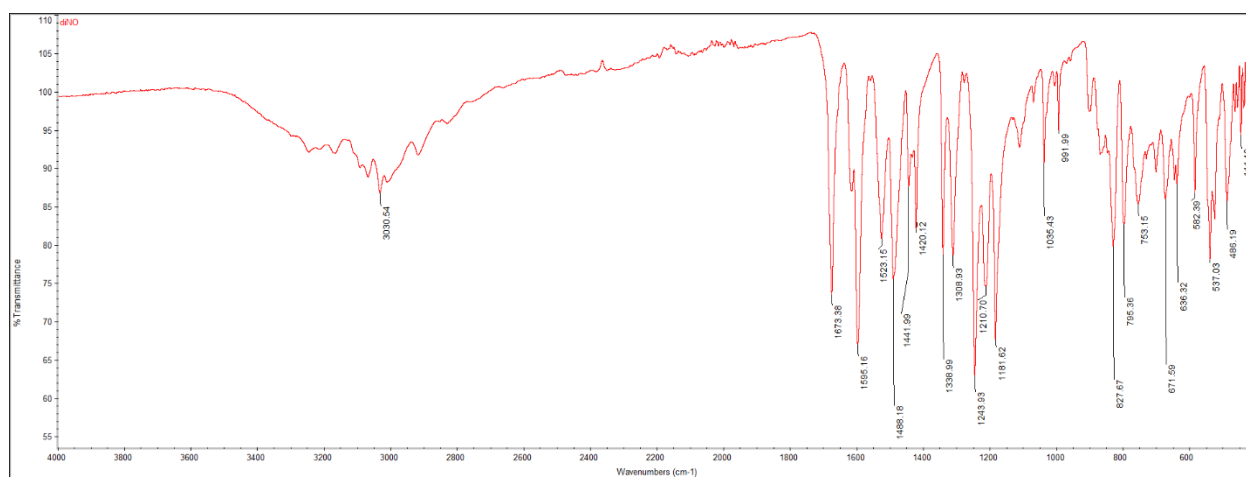

**Figure S4:** IR spectrum of diNO

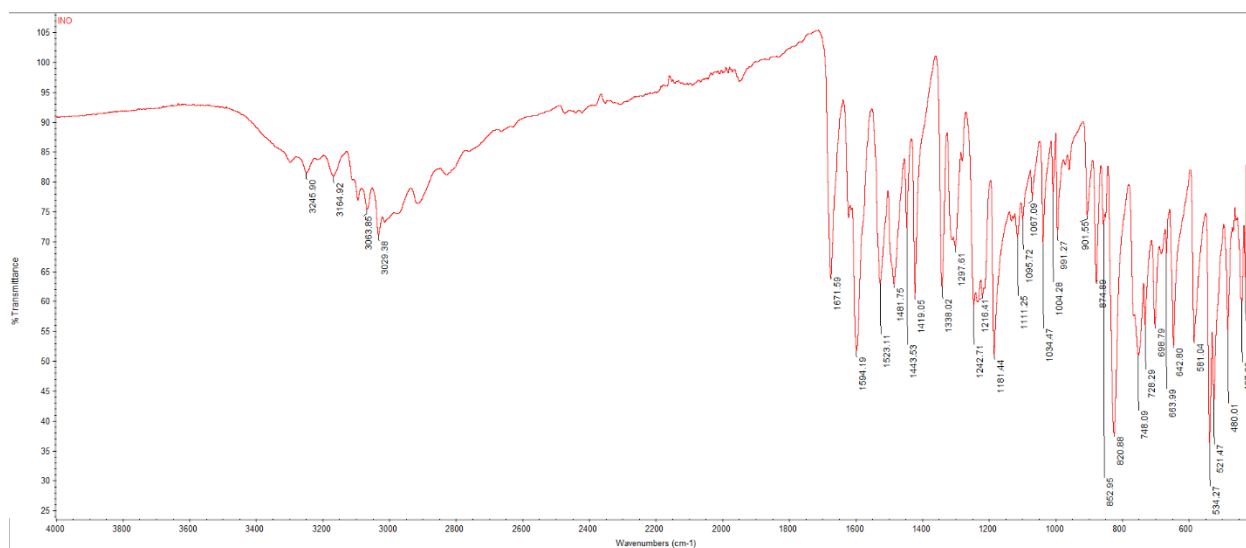

**Figure S5:** IR spectrum of INO (anhydrous form)

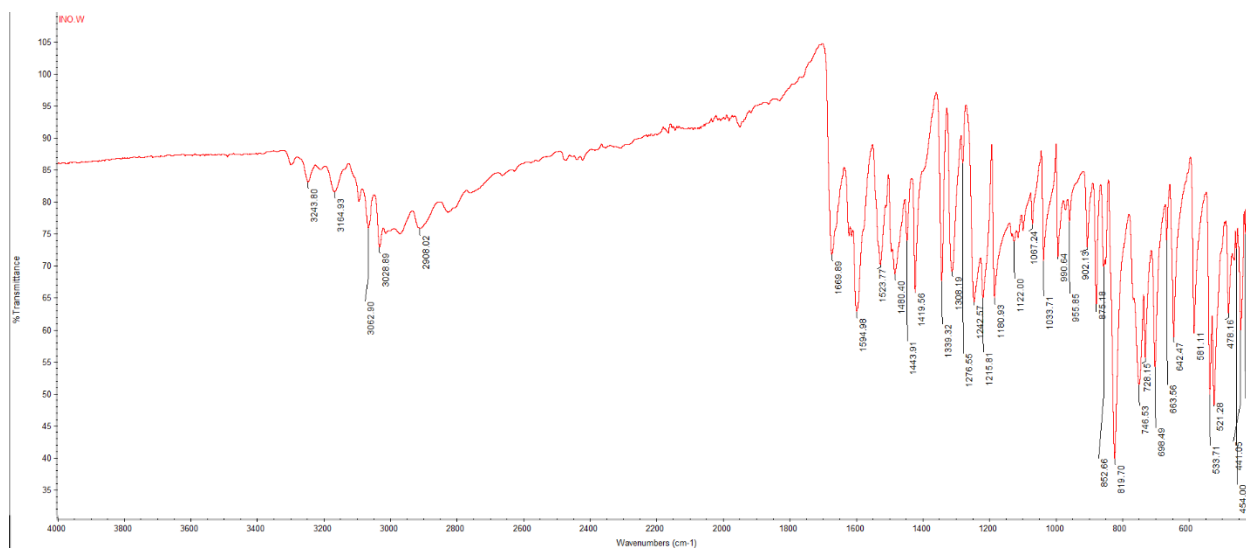

**Figure S6: IR spectrum of INO (hydrated form)**

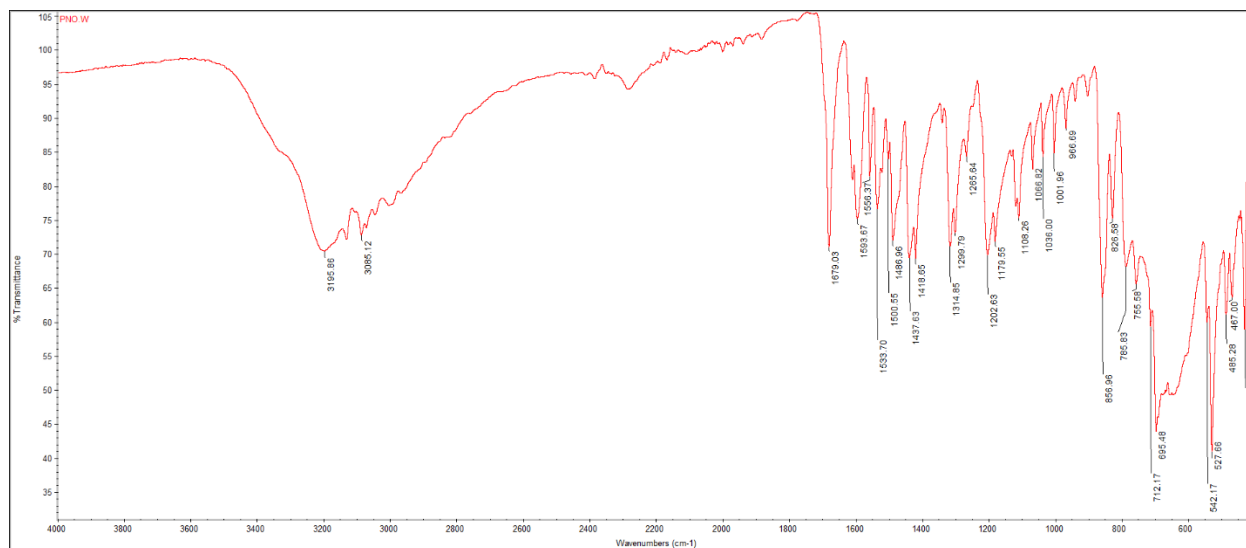

**Figure S7: IR spectrum of PNO**

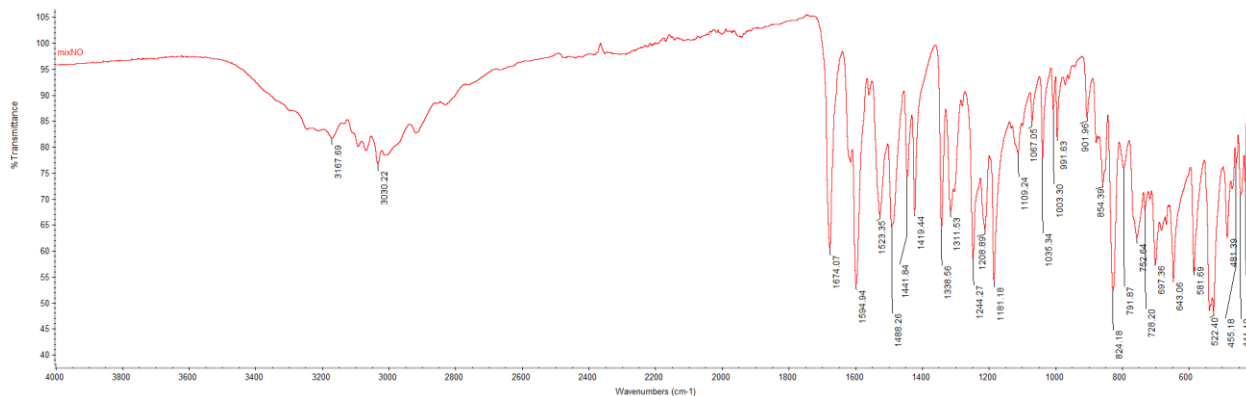

**Figure S8: IR spectrum of 1:1 mixture of INO + PNO**

## Gelation experiments

**Table S1:** Gelation Table of *N*-oxide compounds

| Compound | Amount | Solvent (1.0 mL)        | Initial Observation | Observation in 24 h     |
|----------|--------|-------------------------|---------------------|-------------------------|
| diNO     | 10 mg  | Methanol                | Insoluble           | Precipitate             |
| diNO     | 10 mg  | Ethanol                 | Insoluble           | Precipitate             |
| diNO     | 10 mg  | Tetrahydrofuran         | Insoluble           | Precipitate             |
| diNO     | 10 mg  | Acetonitrile            | Insoluble           | Precipitate             |
| diNO     | 10 mg  | Nitrobenzene            | Insoluble           | Precipitate             |
| diNO     | 10 mg  | Water                   | Solution            | Solution                |
| diNO     | 20 mg  | Water                   | Solution            | Crystal                 |
| diNO     | 30 mg  | Water                   | Solution            | Crystal                 |
| diNO     | 40 mg  | Water                   | Solution            | Gel                     |
| diNO     | 60 mg  | Water                   | Solution            | Gel                     |
| diNO     | 10 mg  | Water/MeOH              | Colloidal           | Crystalline precipitate |
| diNO     | 10 mg  | Water/EtOH              | Colloidal           | Precipitate             |
| diNO     | 10 mg  | Water/THF               | Colloidal           | Precipitate             |
| diNO     | 10 mg  | Water/MeCN              | Colloidal           | Precipitate             |
| diNO     | 10 mg  | Water/PhNO <sub>2</sub> | Insoluble           | Precipitate             |
| diNO     | 20 mg  | Water/MeOH              | Insoluble           | Precipitate             |
| diNO     | 20 mg  | Water/EtOH              | Insoluble           | Precipitate             |
|          |        |                         |                     |                         |
| INO      | 10 mg  | Methanol                | Insoluble           | Precipitate             |
| INO      | 10 mg  | Ethanol                 | Insoluble           | Precipitate             |
| INO      | 10 mg  | Tetrahydrofuran         | Insoluble           | Precipitate             |
| INO      | 10 mg  | Acetonitrile            | Insoluble           | Precipitate             |
| INO      | 10 mg  | Nitrobenzene            | Insoluble           | Precipitate             |
| INO      | 10 mg  | Water                   | Solution            | Solution                |
| INO      | 20 mg  | Water                   | Solution            | Crystal                 |
| INO      | 30 mg  | Water                   | Solution            | Crystal                 |
| INO      | 40 mg  | Water                   | Solution            | Crystal                 |
| INO      | 60 mg  | Water                   | Solution            | Crystal                 |
| INO      | 10 mg  | Water/MeOH              | Solution            | Precipitate             |
| INO      | 10 mg  | Water/EtOH              | Solution            | Precipitate             |
| INO      | 10 mg  | Water/THF               | Colloidal           | Precipitate             |
| INO      | 10 mg  | Water/MeCN              | Colloidal           | Precipitate             |
| INO      | 10 mg  | Water/PhNO <sub>2</sub> | Insoluble           | Precipitate             |
| INO      | 20 mg  | Water/MeOH              | Insoluble           | Precipitate             |
| INO      | 20 mg  | Water/EtOH              | Insoluble           | Precipitate             |
|          |        |                         |                     |                         |
| PNO      | 10 mg  | Methanol                | Insoluble           | Precipitate             |
| PNO      | 10 mg  | Ethanol                 | Insoluble           | Precipitate             |
| PNO      | 10 mg  | Tetrahydrofuran         | Insoluble           | Precipitate             |
| PNO      | 10 mg  | Acetonitrile            | Insoluble           | Precipitate             |
| PNO      | 10 mg  | Nitrobenzene            | Insoluble           | Precipitate             |



|                           |       |                         |           |             |
|---------------------------|-------|-------------------------|-----------|-------------|
| <i>Table S1 continued</i> |       |                         |           |             |
| <b>PNO</b>                | 10 mg | Water                   | Solution  | Solution    |
| <b>PNO</b>                | 20 mg | Water                   | Solution  | Crystal     |
| <b>PNO</b>                | 30 mg | Water                   | Solution  | Crystal     |
| <b>PNO</b>                | 40 mg | Water                   | Solution  | Crystal     |
| <b>PNO</b>                | 60 mg | Water                   | Solution  | Crystal     |
| <b>PNO</b>                | 10 mg | Water/MeOH              | Colloidal | Precipitate |
| <b>PNO</b>                | 10 mg | Water/EtOH              | Colloidal | Precipitate |
| <b>PNO</b>                | 10 mg | Water/THF               | Colloidal | Precipitate |
| <b>PNO</b>                | 10 mg | Water/MeCN              | Colloidal | Precipitate |
| <b>PNO</b>                | 10 mg | Water/PhNO <sub>2</sub> | Insoluble | Precipitate |
|                           |       |                         |           |             |
| <b>INO + PNO</b>          | 10 mg | Methanol                | Insoluble | Precipitate |
| <b>INO + PNO</b>          | 10 mg | Ethanol                 | Insoluble | Precipitate |
| <b>INO + PNO</b>          | 10 mg | Tetrahydrofuran         | Insoluble | Precipitate |
| <b>INO + PNO</b>          | 10 mg | Acetonitrile            | Insoluble | Precipitate |
| <b>INO + PNO</b>          | 10 mg | Nitrobenzene            | Insoluble | Precipitate |
| <b>INO + PNO</b>          | 10 mg | Water                   | Solution  | Solution    |
| <b>INO + PNO</b>          | 20 mg | Water                   | Solution  | Crystal     |
| <b>INO + PNO</b>          | 30 mg | Water                   | Solution  | Crystal     |
| <b>INO + PNO</b>          | 40 mg | Water                   | Solution  | Crystal     |
| <b>INO + PNO</b>          | 60 mg | Water                   | Solution  | Crystal     |
| <b>INO + PNO</b>          | 10 mg | Water/MeOH              | Colloidal | Precipitate |
| <b>INO + PNO</b>          | 10 mg | Water/EtOH              | Colloidal | Precipitate |
| <b>INO + PNO</b>          | 10 mg | Water/THF               | Colloidal | Precipitate |
| <b>INO + PNO</b>          | 10 mg | Water/MeCN              | Colloidal | Precipitate |
| <b>INO + PNO</b>          | 10 mg | Water/PhNO <sub>2</sub> | Insoluble | Precipitate |

**Table S2:** Determination of MGC of **diNO**

| Amount | Solvent (1.0 mL) | Initial Observation | Observation in 24 h |
|--------|------------------|---------------------|---------------------|
| 30 mg  | Water            | Solution            | Crystal             |
| 33 mg  | Water            | Solution            | Crystal             |
| 36 mg  | Water            | Solution            | Partial Gel         |
| 38 mg  | Water            | Solution            | Partial Gel         |
| 40 mg  | Water            | Solution            | Gel                 |
| 45 mg  | Water            | Solution            | Gel                 |
| 50 mg  | Water            | Solution            | Gel                 |

**Table S3:** Determination of  $T_{gel}$  of **diNO**

| Amount | Solvent (1.0 mL) | Time | $T_{gel}$ |
|--------|------------------|------|-----------|
| 40 mg  | Water            | 24 h | 78.0 °C   |
| 60 mg  | Water            | 24 h | 80.0 °C   |

## Crystal Data of the *N*-oxide compounds

**Table S4:** Crystal Data for the *N*-oxide compounds

| Crystal data                                                   | diNO                                                         | INO                                                          | INO.2H <sub>2</sub> O                                         | PNO.2H <sub>2</sub> O                                         |
|----------------------------------------------------------------|--------------------------------------------------------------|--------------------------------------------------------------|---------------------------------------------------------------|---------------------------------------------------------------|
| Empirical formula                                              | C <sub>11</sub> H <sub>9</sub> N <sub>3</sub> O <sub>3</sub> | C <sub>11</sub> H <sub>9</sub> N <sub>3</sub> O <sub>2</sub> | C <sub>11</sub> H <sub>13</sub> N <sub>3</sub> O <sub>4</sub> | C <sub>11</sub> H <sub>13</sub> N <sub>3</sub> O <sub>4</sub> |
| Colour                                                         | Colourless                                                   | Colourless                                                   | Colourless                                                    | Colourless                                                    |
| Formula weight                                                 | 231.21                                                       | 215.21                                                       | 251.24                                                        | 251.24                                                        |
| Crystal size (mm)                                              | 0.3x0.18x0.08                                                | 0.45x0.2x0.08                                                | 0.48x0.24x0.18                                                | 0.24x0.21x0.14                                                |
| Crystal system                                                 | triclinic                                                    | triclinic                                                    | monoclinic                                                    | triclinic                                                     |
| Space group                                                    | P $\bar{1}$                                                  | P $\bar{1}$                                                  | C2/c                                                          | P $\bar{1}$                                                   |
| a (Å)                                                          | 6.6694(9)                                                    | 6.8242(10)                                                   | 18.2418(15)                                                   | 7.4444(6)                                                     |
| b (Å)                                                          | 8.5614(12)                                                   | 8.5382(13)                                                   | 13.0771(11)                                                   | 8.1856(7)                                                     |
| c (Å)                                                          | 9.2107(13)                                                   | 9.1542(13)                                                   | 13.6389(11)                                                   | 10.0952(9)                                                    |
| $\alpha$ (°)                                                   | 95.653(4)                                                    | 98.243(4)                                                    | 90                                                            | 95.322(3)                                                     |
| $\beta$ (°)                                                    | 101.326(4)                                                   | 105.184(4)                                                   | 130.390(2)                                                    | 103.371(3)                                                    |
| $\gamma$ (°)                                                   | 104.266(4)                                                   | 103.773(4)                                                   | 90                                                            | 90.353(3)                                                     |
| Volume (Å <sup>3</sup> )                                       | 493.77(12)                                                   | 487.77(12)                                                   | 2478.1(4)                                                     | 595.67(9)                                                     |
| Z                                                              | 2                                                            | 2                                                            | 8                                                             | 2                                                             |
| D <sub>calc.</sub> (g/cm <sup>3</sup> )                        | 1.555                                                        | 1.465                                                        | 1.347                                                         | 1.401                                                         |
| F(000)                                                         | 240                                                          | 224                                                          | 1056                                                          | 264                                                           |
| $\mu$ MoK $\alpha$ (mm <sup>-1</sup> )                         | 0.117                                                        | 0.105                                                        | 0.104                                                         | 0.109                                                         |
| Temperature (K)                                                | 296(2)                                                       | 296(2)                                                       | 300(2)                                                        | 296(2)                                                        |
| Reflections collected/<br>unique/observed [ $I > 2\sigma(I)$ ] | 23437/2796/<br>2258                                          | 22681/2860/<br>2515                                          | 37643/3488/<br>2490                                           | 23800/3371/<br>2722                                           |
| Data/restraints/parameters                                     | 2796/0/154                                                   | 2860/0/145                                                   | 3488/0/179                                                    | 3371/0/179                                                    |
| Goodness of fit on F <sup>2</sup>                              | 1.033                                                        | 1.050                                                        | 1.043                                                         | 1.090                                                         |
| Final R indices [ $I > 2\sigma(I)$ ]                           | R <sub>1</sub> = 0.0453<br>wR <sub>2</sub> = 0.1271          | R <sub>1</sub> = 0.0423<br>wR <sub>2</sub> = 0.1221          | R <sub>1</sub> = 0.0457<br>wR <sub>2</sub> = 0.1309           | R <sub>1</sub> = 0.0423<br>wR <sub>2</sub> = 0.1272           |
| R indices (all data)                                           | R <sub>1</sub> = 0.0601<br>wR <sub>2</sub> = 0.1355          | R <sub>1</sub> = 0.0482<br>wR <sub>2</sub> = 0.1280          | R <sub>1</sub> = 0.0687<br>wR <sub>2</sub> = 0.1441           | R <sub>1</sub> = 0.0546<br>wR <sub>2</sub> = 0.1351           |

## Crystal Structures

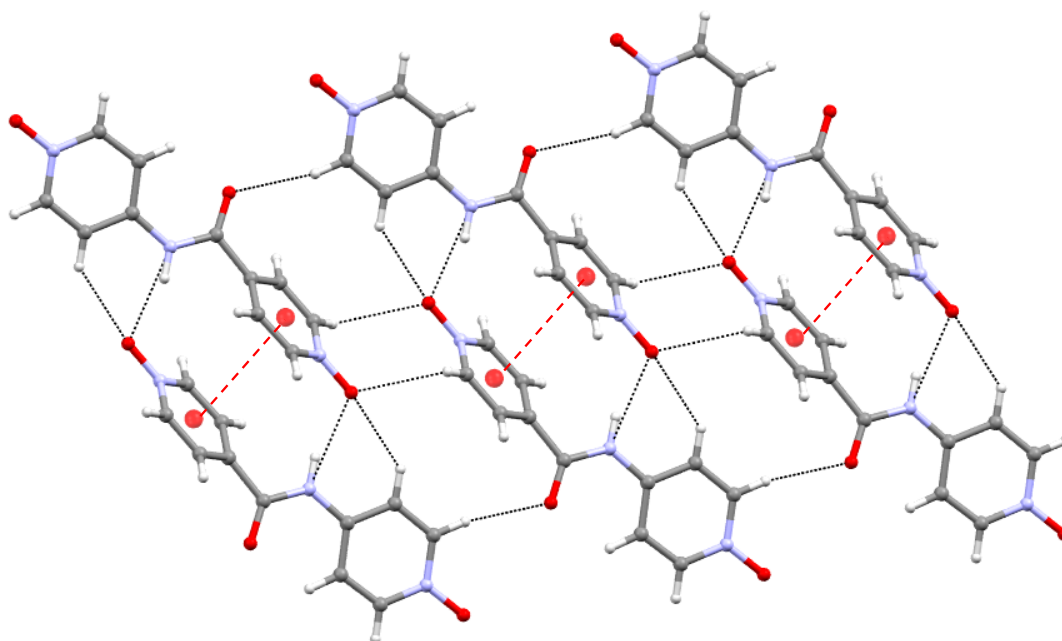

**Figure S9:** Crystal structure of **diNO** showing  $\pi$ - $\pi$  and C-H...O interactions

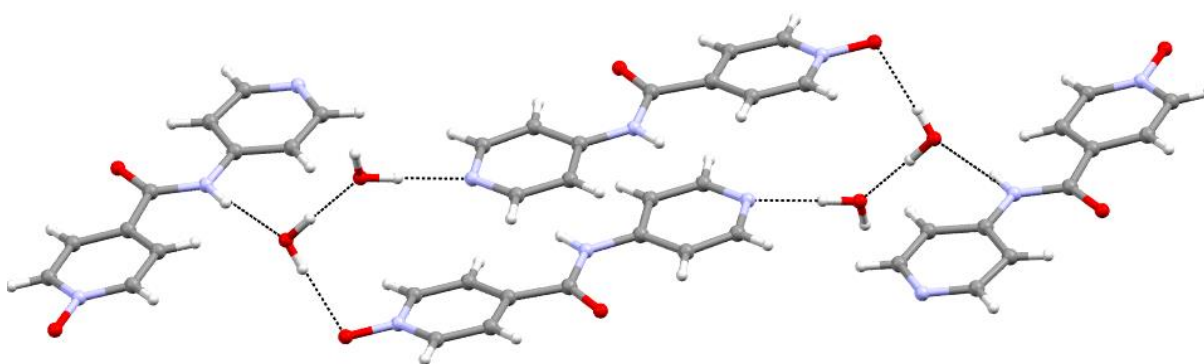

**Figure S10:** Crystal structure of **INO.2H<sub>2</sub>O** showing hydrogen-bonding with water molecules

## X-ray powder diffraction (XRPD)

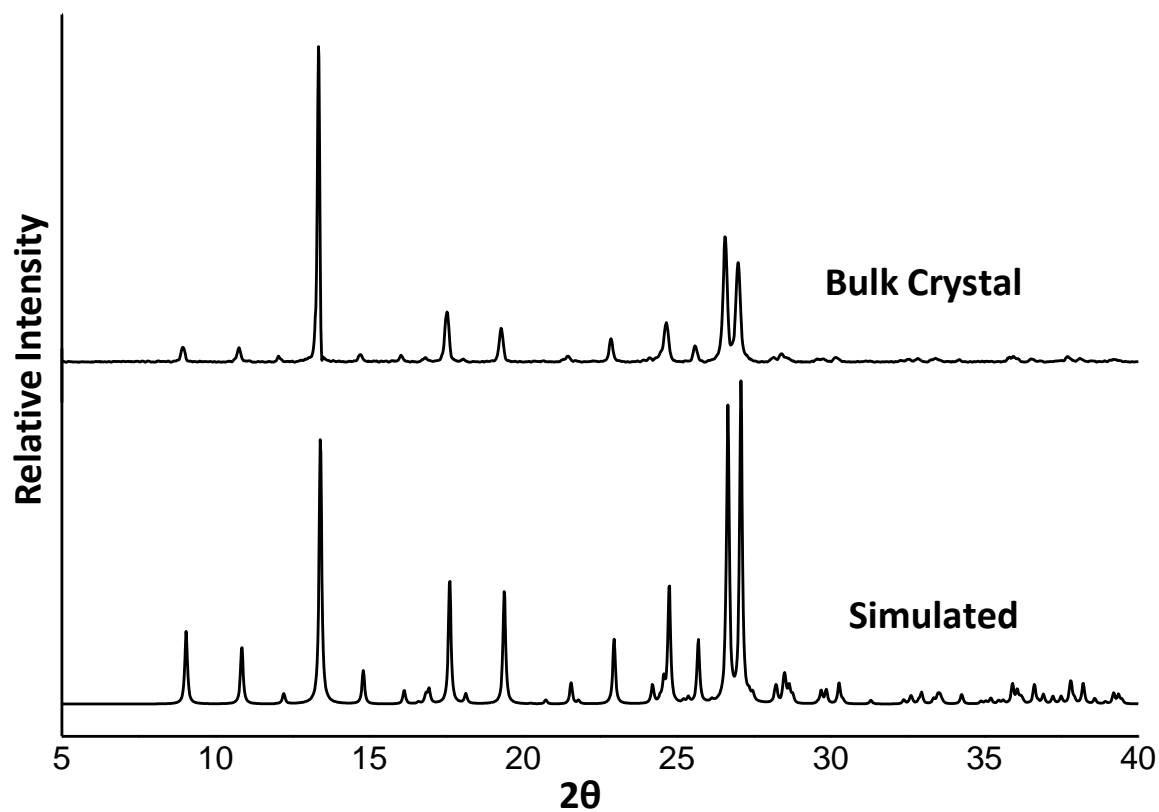

**Figure S11:** XRPD comparison of **PNO**: simulated pattern from SCXRD data and bulk crystals obtained from water

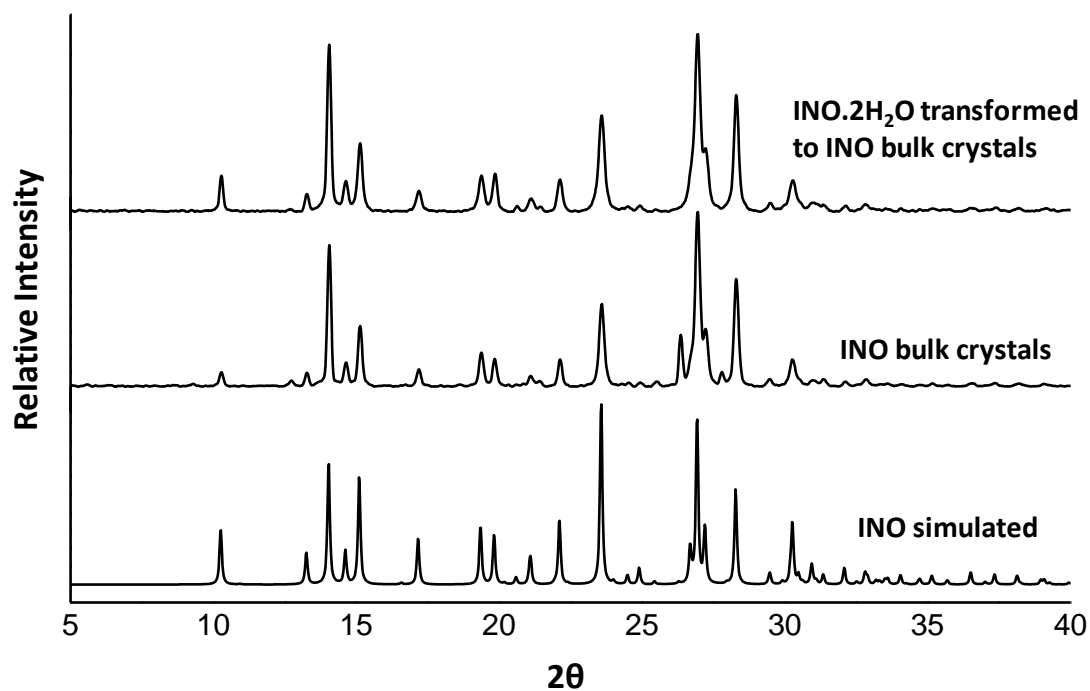

**Figure S12:** XRPD comparison of **INO**: simulated pattern of **INO**, bulk crystals of **INO** and **INO.2H<sub>2</sub>O**. The pattern indicates that the kinetically favored form **INO.2H<sub>2</sub>O** was slowly converted to the thermodynamically stable **INO** form.

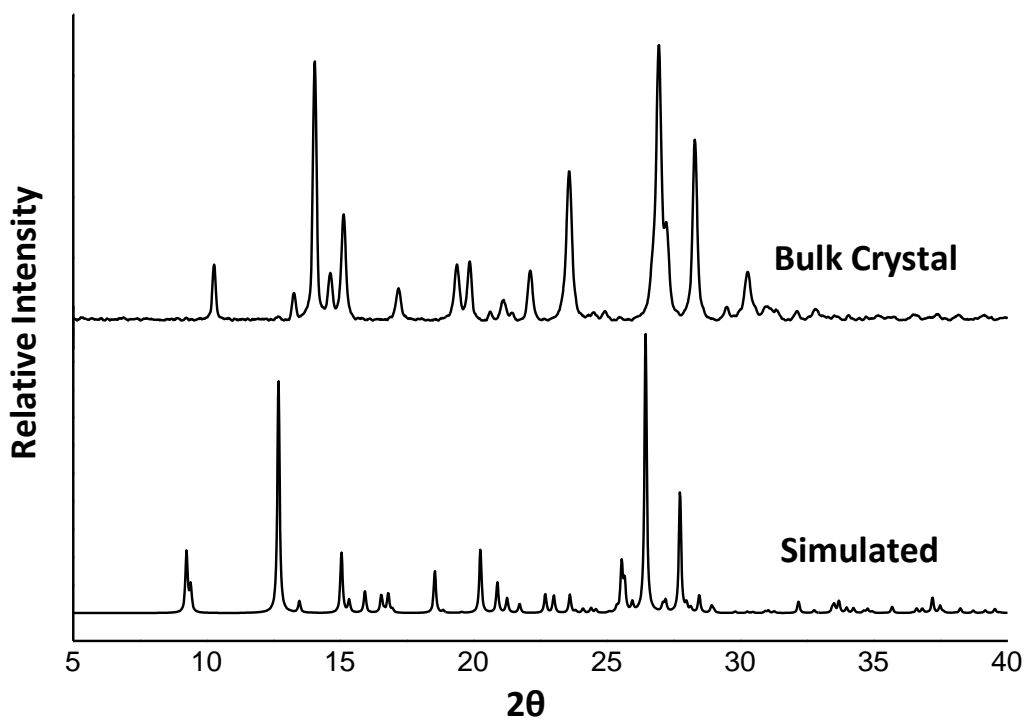

**Figure S13:** XRPD comparison of **INO.2H<sub>2</sub>O** (hydrated form): Simulated pattern and bulk crystals obtained from water.

## Rheology experiments

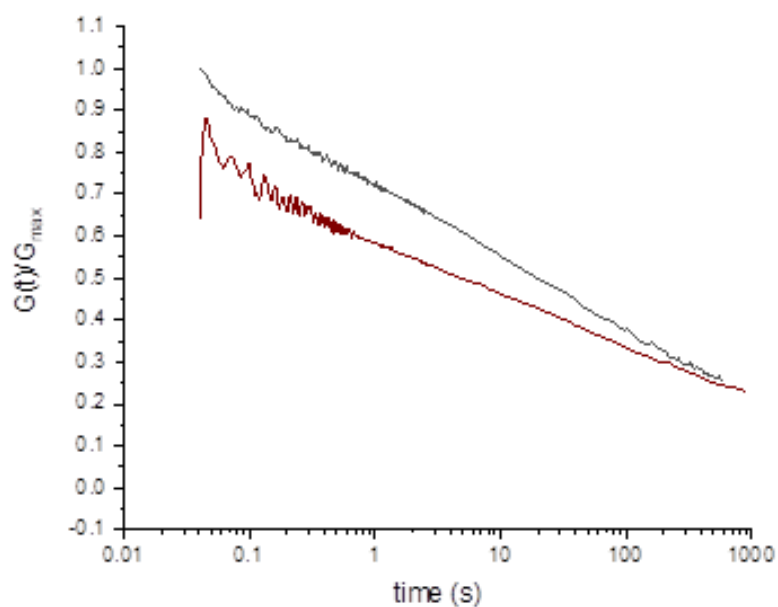

**Figure S14:** Stress relaxation experiments performed at 1.0% strain indicating that both samples show an extensive relaxation time, indicative of a gel-like response which have a temporally persistent entangled network.

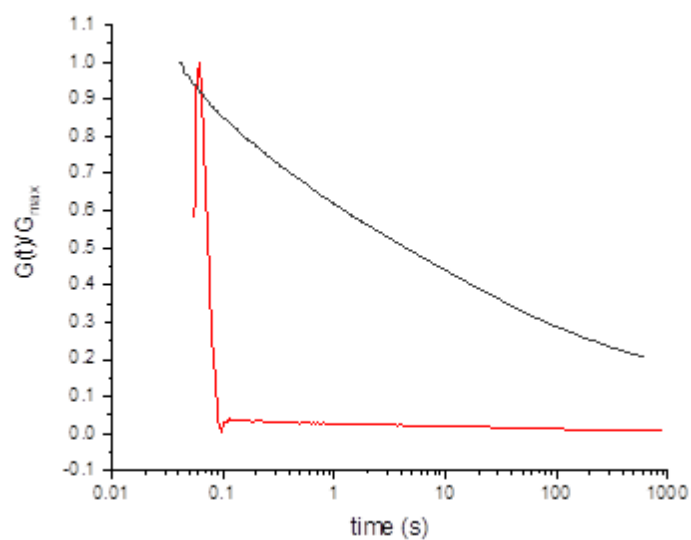

**Figure S15:** Stress relaxation experiments performed at 10.0% strain showing the difference between the relaxation time of **4PINA** and **diNO**.

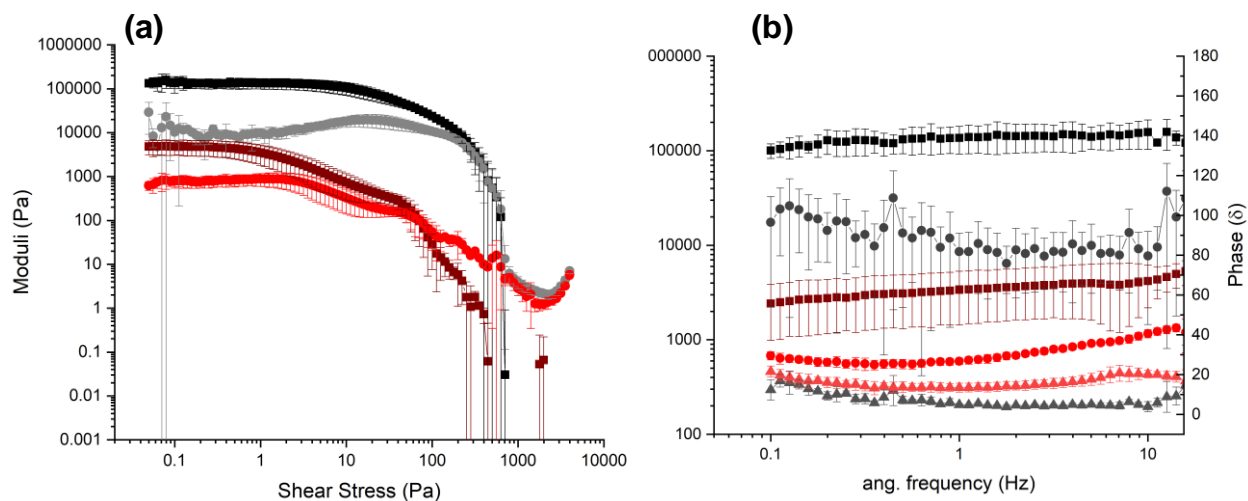

**Figure S16:** Oscillatory amplitude sweeps (a) and oscillatory frequency sweeps (b), for **4PINA** (black) and **diNO** (red). For both  $\blacksquare$  refer to  $G'$  and  $\bullet$  refer to  $G''$ , the storage modulus and viscous modulus, at 4.0 wt% respectively.  $\Delta$  refer to the phase lag ( $\delta$ ). Error bars indicate the standard deviation calculated from the repeated measurements
